# Supplementary material for: Borrelia burgdorferi peptidoglycan is a persistent antigen in patients with Lyme arthritis
Source: PubMed Central journal article supplement — Proc Natl Acad Sci U S A. 2019 Jun 17;116(27):13498–507. doi: 10.1073/pnas.1904170116 (PMC6613144; doi:10.1073/pnas.1904170116), 2019-06-17
Supplement: pnas.1904170116.sapp.pdf [file pnas.1904170116.sapp.pdf]

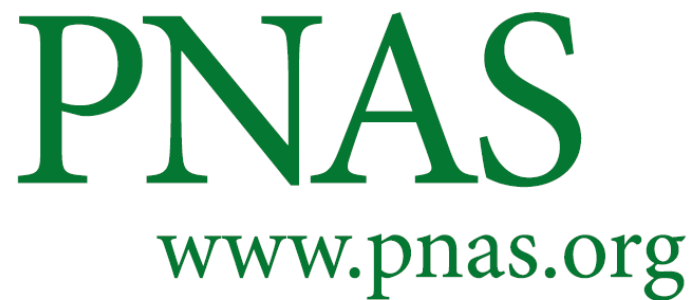

Supplementary Information for

***Borrelia burgdorferi* peptidoglycan is a persistent antigen in patients with Lyme arthritis**

Brandon L. Jutras, Robert B. Lochhead, Zachary A. Kloos, Jacob Biboy, Klemen Strle, Carmen J. Booth, Sander K. Govers, Joe Gray, Peter Schumann, Waldemar Vollmer, Linda K. Bockenstedt, Allen C. Steere, Christine Jacobs-Wagner

Corresponding author: Christine Jacobs-Wagner  
Email: [christine.jacobs-wagner@yale.edu](mailto:christine.jacobs-wagner@yale.edu)

**This PDF file includes:**

Figs. S1 to S7  
Tables S1

Supplemental Figures

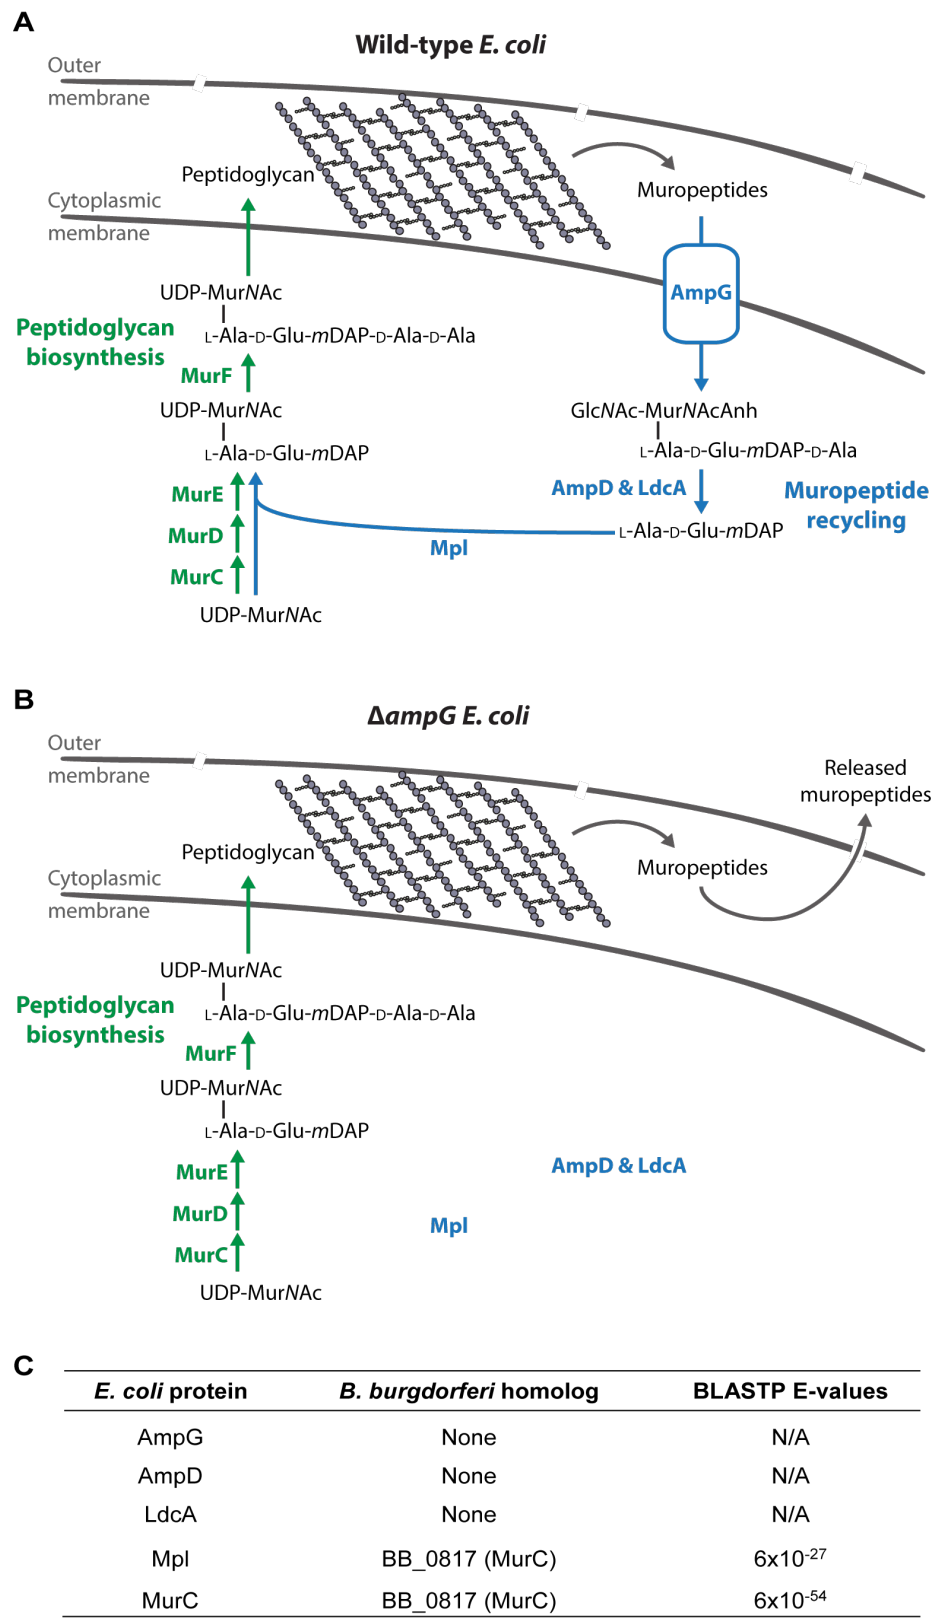

**Fig. S1.** Fate of muropeptides in wild-type and  $\Delta ampG$  mutant strains of *Escherichia coli*. (A) Schematic showing the pathway involved in recycling the peptide moiety of the peptidoglycan (PG) of wild-type *E. coli* (and other Gram-negative bacteria) into the cytoplasmic PG biosynthetic pathway. (B) Schematic showing that the majority of muropeptides generated during normal PG turnover are released into the environment in a  $\Delta ampG$  mutant of *E. coli*. (C) Sequence homology search analysis showing that *B. burgdorferi* lacks apparent homologs of PG recycling proteins found in *E. coli*. Homology searches were performed using BLASTP's default parameters and a query sequence retrieved from NCBI's RefSeq database for each of the *E. coli* K-12 MG1655 proteins shown.

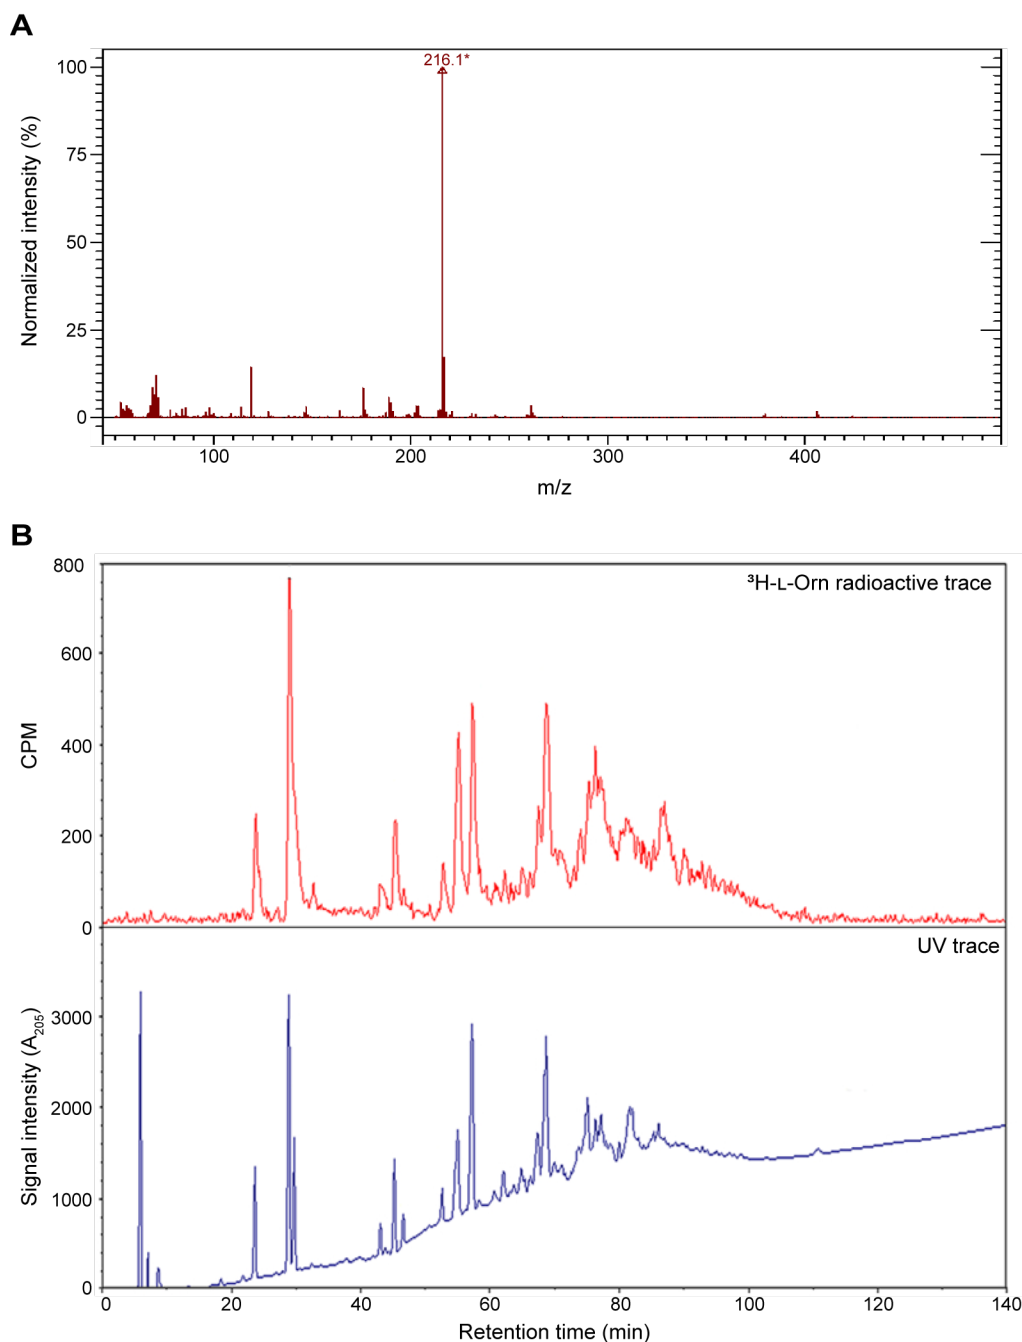

**Fig. S2. Verification of the presence of ornithine in PG<sup>Bb</sup>.** (A) Electron impact mass spectrum (normalized intensity versus mass-to-charge ratio (m/z)) showing the presence of Orn in PG<sup>Bb</sup>. Gas chromatography (GC) coupled to mass spectrometry (MS) proved the identity of *N*-pentafluoropropionyl ornithine isopropylester obtained from the hydrolysate (4N HCl, 100 °C, 16 h) of PG<sup>Bb</sup> by the characteristic cyclic iminium fragment-ion at 216 m/z (shown by the asterisk), in agreement with data of the authentic standard substance. (B) Analysis of radiolabeled PG<sup>Bb</sup>. Shown are chromatograms of cellosyl-digested PG<sup>Bb</sup> labeled with <sup>3</sup>H-L-Orn. Mucopeptides were detected by UV absorbance or liquid scintillation in counts per minute (CPM).

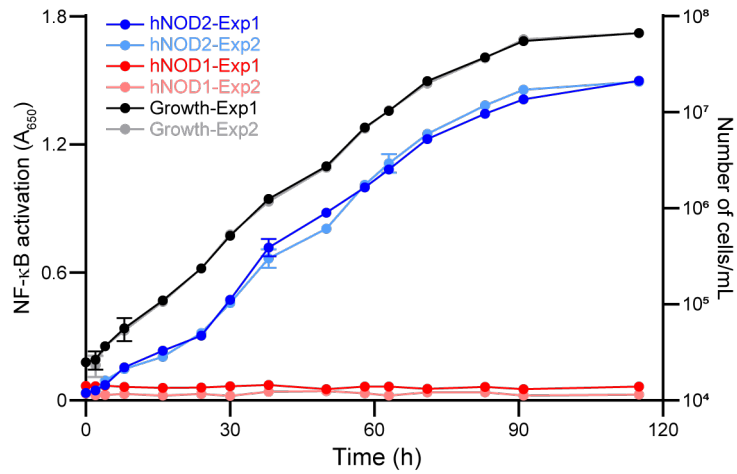

**Fig. S3.** Time-course analysis of muropeptide accumulation in the culture medium during *B. burgdorferi* growth. Batch cultures of *B. burgdorferi* were monitored for growth and muropeptide release using human NOD2 and NOD1 reporter cells (hNOD1 and hNOD2). At each time point (dots), a fraction of two independent cultures was removed, the density determined in cells/mL using a counting chamber (black and grey lines) and supernatants collected, processed, and assayed for hNOD1 or hNOD2 activation by monitoring NF- $\kappa$ B activity. Replicate cultures were analyzed in tandem (Exp 1 and 2) and each sample was analyzed in triplicate. Data points are the mean  $\pm$  standard deviation for each experiment. Note that the black line largely covers the grey line because of their overlap.

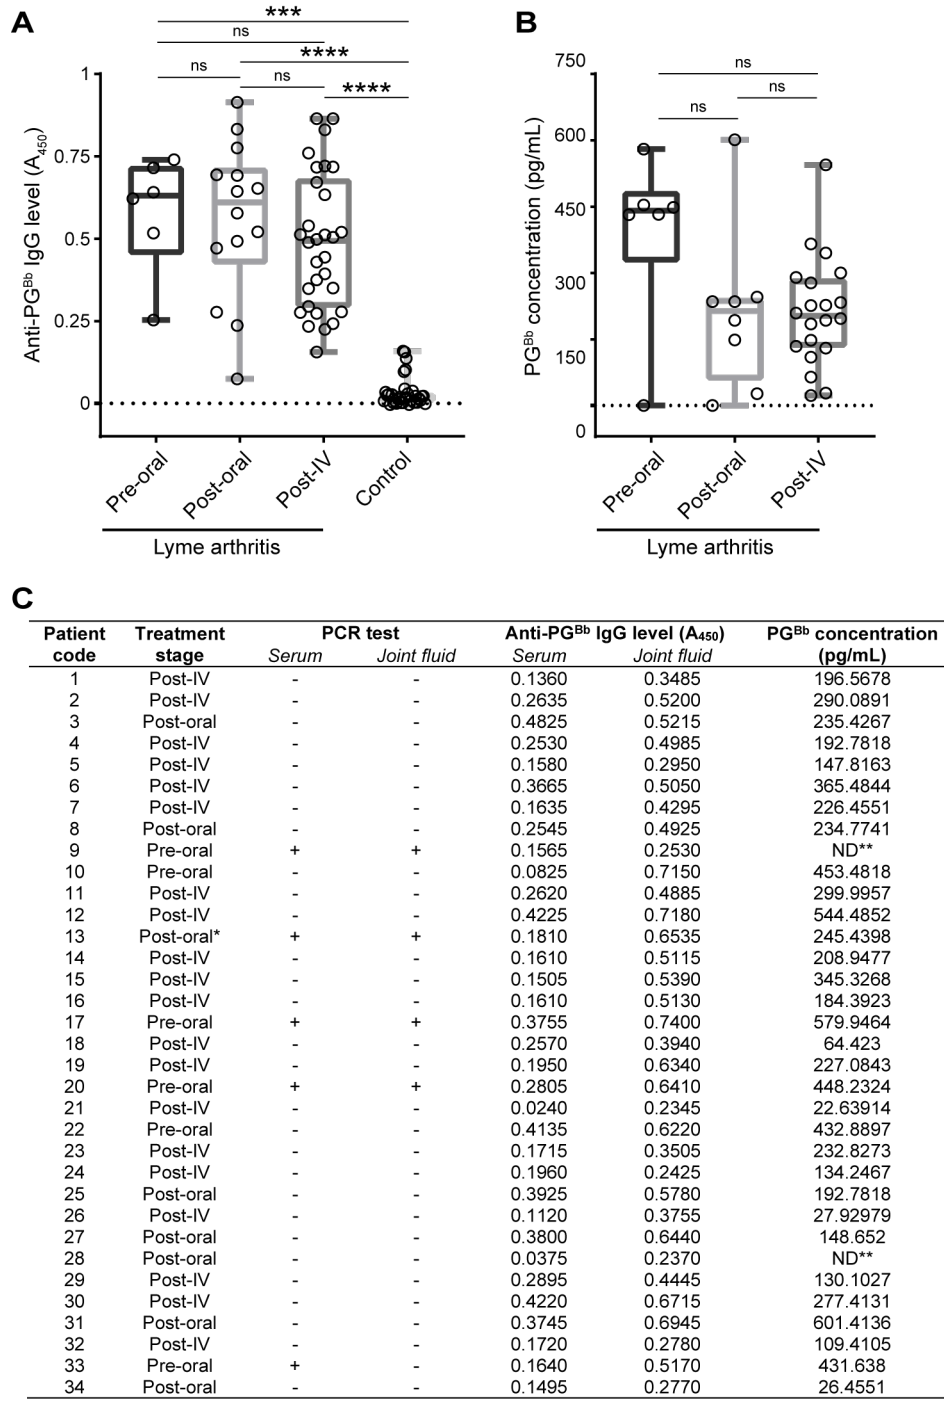

**Fig. S4.** Analysis of human Lyme arthritis synovial fluids based on treatment stage. (A) Box plot showing the levels of anti-PG<sup>Bb</sup> IgG in synovial fluid samples of Lyme arthritis (LA) patients based on treatment stage, i.e., before oral antibiotic treatment (pre-oral, n = 6), after oral antibiotic treatment (post-oral, n = 14) or after both oral and intravenous antibiotic treatment (post-IV, n = 30) as determined by ELISA (see Fig. 2A). Included are control synovial fluid samples from patients suffering from a torn ACL (n = 1) or other forms of arthritis (n = 32). A Kruskal-Wallis test on the four groups resulted in  $p < 0.0001$ .

Kruskal-Wallis test followed by a Dunn's post-hoc pairwise test revealed that the anti-PG<sup>Bb</sup> IgG level of all LA sample groups (stage (pre-oral, post-oral or post-IV antibiotic) was statistically significant different from the control group (\*\*\*\* indicates  $p < 0.0001$  whereas \*\*\* indicates  $p < 0.001$ ). In contrast, there was no significant difference (ns) in anti-PG<sup>Bb</sup> IgG levels between the different LA sample groups (adjusted  $p > 0.99$ ). (B) Box plot showing the concentration of PG<sup>Bb</sup> in LA samples organized by treatment stage: before oral antibiotic treatment ( $n = 6$ ), after oral antibiotic treatment ( $n = 8$ ) or after both oral and intravenous antibiotic treatment ( $n = 20$ ) based on a competitive ELISA using anti-serum raised against PG<sup>Bb</sup>. Only patients with available synovial and serum samples were considered in this assay. Kruskal-Wallis test comparing the three groups yielded  $p = 0.1$ . (C) Table showing the results of PCR, anti-PG<sup>Bb</sup> IgG and PG-concentration analyses for the serum and synovial fluid samples of 34 LA patients at different treatment stages of disease. See Methods for details.

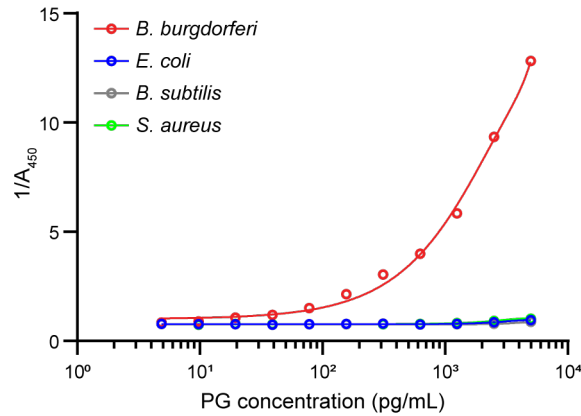

**Fig. S5.** Specificity and sensitivity of rabbit anti-serum raised against *B. burgdorferi* PG (anti-PG<sup>Bb</sup>) using a competitive ELISA. PG<sup>Bb</sup>-coated plates were incubated with titrations of known concentrations of PG purified from *B. burgdorferi*, *E. coli*, *Staphylococcus aureus*, and *Bacillus subtilis* that were pre-incubated with fixed amount of anti-PG<sup>Bb</sup> serum. Inverse spectrophotometric absorbance values are graphed as a function of PG concentrations (in pg/mL). A third-order polynomial equation (lines) was used to calculate the amount of PG in patient samples.

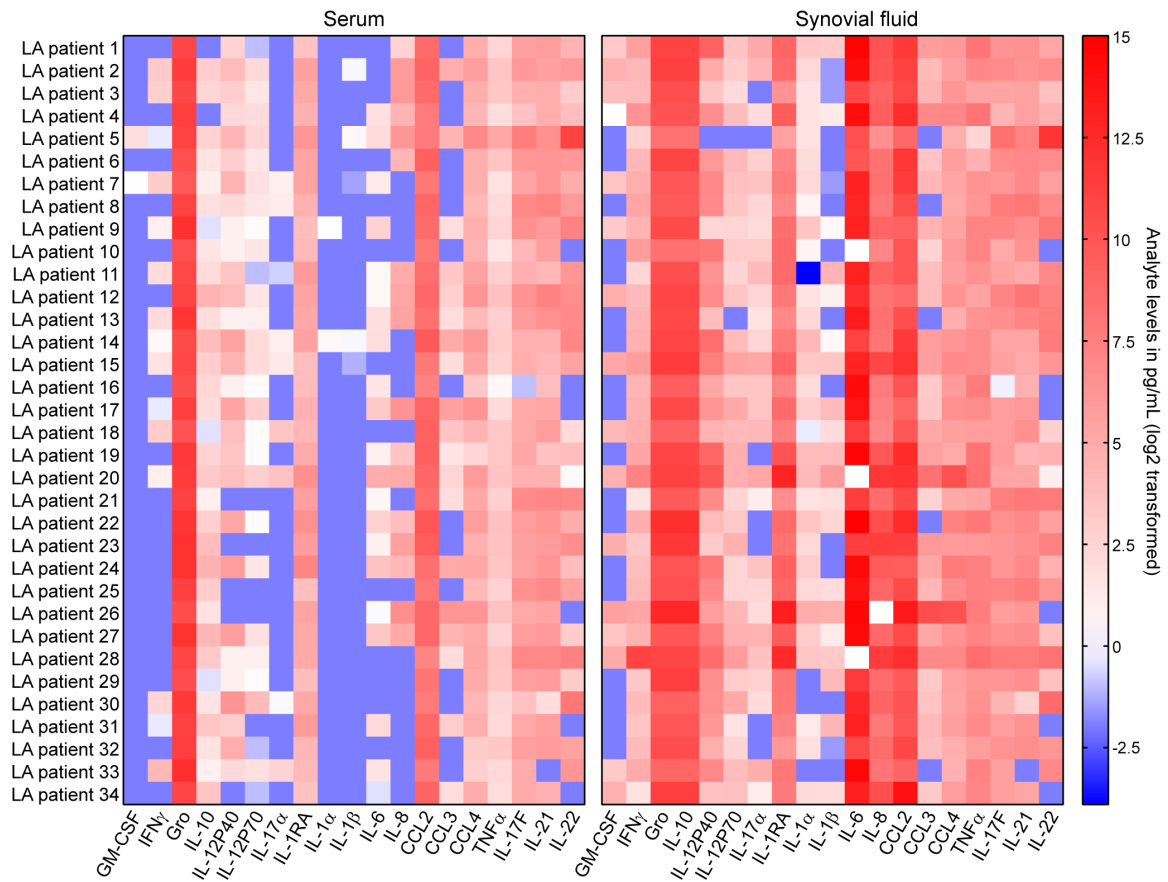

**Fig. S6.** Pairwise comparison of cytokine profiles in serum and synovial fluid samples of LA patients using Luminex bead arrays. Heat map values are the mean of replicate values in pg/mL of each analyte, followed by log<sub>2</sub> transformation.

### A 18 h post PBMC stimulation

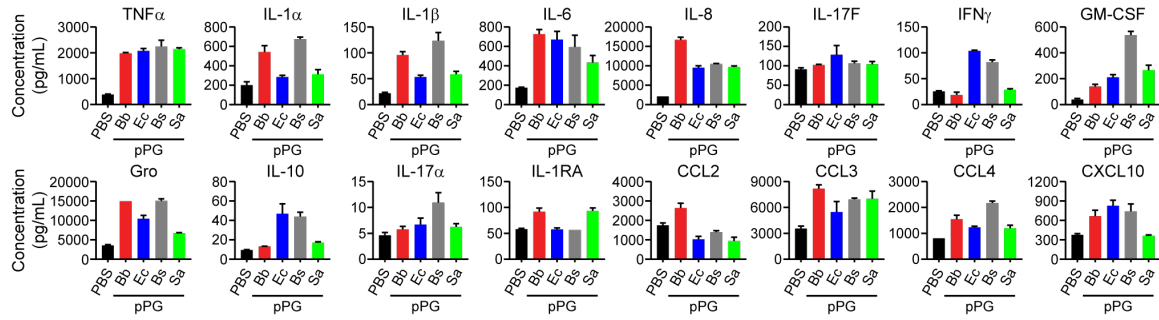

### B 18 h post PBMC stimulation

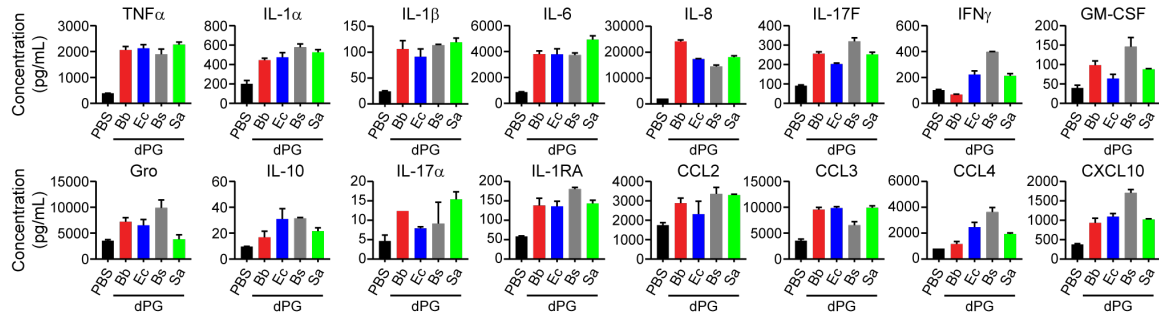

### C 72 h post PBMC stimulation

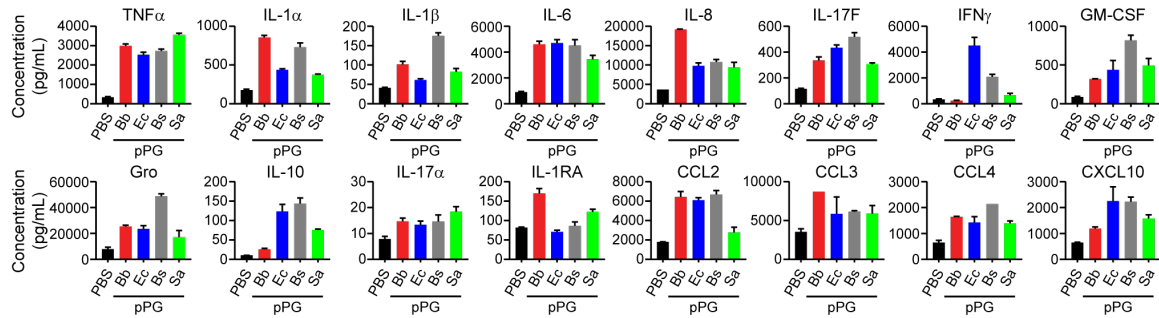

### D 72 h post PBMC stimulation

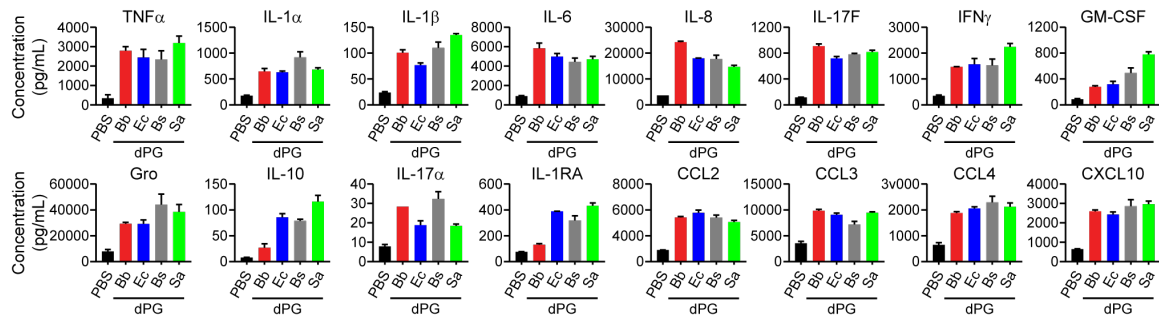

**Fig. S7.** In vitro stimulation of cytokine production in human peripheral blood mononuclear cells (PBMCs) by different types of PG. (A) Levels of indicated analytes secreted by control human PBMCs stimulated for 18 h by PBS (control) or 100  $\mu$ g/mL of polymeric(pPG) isolated from *B. burgdorferi* (Bb), *E. coli* (Ec), *B. subtilis* (Bs), or *S. aureus* (Sa). (B) Same as (A) except that stimulation was with mutanolysin-digested (dPG) PG. (C) Same as (A) but after 72 h of stimulation. (D) Same as (B) but after 72 h of stimulation.

**Table S1. Analysis of mucopeptides produced by mutanolysin digestion of *B. burgdorferi* peptidoglycan**

| Peak | Muropeptide                                                                                        | Mean peak percent area (+/- SD) <sup>†</sup> | Mass (neutral from m/z) |             | RT (min) | CPM per area |
|------|----------------------------------------------------------------------------------------------------|----------------------------------------------|-------------------------|-------------|----------|--------------|
|      |                                                                                                    |                                              | Measured                | Theoretical |          |              |
| 1    | MurNAc(r)-L-Ala-D-Glu-L-Orn-Gly                                                                    | 3.99 (0.36)                                  | 666.3134                | 666.3072    | 23.47    | 2.17         |
| 2    | GlcNAc-MurNAc(r)-L-Ala-D-Glu-L-Orn-Gly                                                             | 9.37 (0.57)                                  | 869.3881                | 869.3866    | 28.70    | 2.99         |
| 3    | HexNAc-GlcNAc-MurNAcAnh-L-Ala-D-Glu-L-Orn-Gly                                                      | 3.69 (0.23)                                  | 1052.4354               | 1052.4398   | 42.90    | 3.63         |
| 4    | GlcNAc-MurNAcAnh-L-Ala-D-Glu-L-Orn-Gly (isomer of 7)                                               | 2.01 (0.31)                                  | 849.3560                | 849.3604    | 45.10    | 2.13         |
| 5    | GlcNAc-MurNAc(L-Ala-D-Glu-L-Orn-Gly)-GlcNAc-MurNAc(r)-L-Ala-D-Glu-L-Orn-Gly                        | 0.93 (0.10)                                  | 1718.7708               | 1718.7469   | 46.45    | 1.52         |
| 6    | MurNAc(r)-L-Ala-D-Glu-L-Orn-Gly-D-Ala-L-Orn-Gly-D-Glu-L-Ala-MurNAc(r)                              | 1.11 0.05                                    | 1385.6420               | 1385.6409   | 52.48    | 3.77         |
| 7    | GlcNAc-MurNAcAnh-L-Ala-D-Glu-L-Orn-Gly (isomer of 4)                                               | 6.47 (1.45)                                  | 849.3598                | 849.3604    | 54.48    | 0            |
| 8    | MurNAc(r)-L-Ala-D-Glu-L-Orn-Gly-D-Ala-L-Orn-Gly-D-Glu-L-Ala-MurNAc(r)-GlcNAc                       | 1.32 (1.03)                                  | 1588.7210               | 1588.7203   | 54.82    | 9.49         |
| 9    | GlcNAc-MurNAc(r)-L-Ala-D-Glu-L-Orn-Gly-D-Ala-L-Orn-Gly-D-Glu-L-Ala-MurNAc(r)-GlcNAc                | 11.41 (0.42)                                 | 1791.8010               | 1791.7997   | 57.18    | 4.60         |
| 10   | GlcNAc-MurNAcAnh-L-Ala-D-Glu-L-Orn-Gly-D-Ala-L-Orn-Gly-D-Glu-L-Ala-MurNAc(r)-GlcNAc (isomer of 11) | 3.13 (0.12)                                  | 1771.7735               | 1771.7782   | 68.60    | 5.30         |
| 11   | GlcNAc-MurNAcAnh-L-Ala-D-Glu-L-Orn-Gly-D-Ala-L-Orn-Gly-D-Glu-L-Ala-MurNAc(r)-GlcNAc (isomer of 10) | 1.69 (0.37)                                  | 1771.7735               | 1771.7750   | 76.27    | 5.65         |

|        |                                              |              |          |   |       |   |
|--------|----------------------------------------------|--------------|----------|---|-------|---|
| 1 - 11 | all known                                    | 45.10 (1.98) | -        | - | -     | - |
| *      | Unknown                                      | 6.58 (0.24)  | 906.3449 |   | 29.55 | 0 |
|        | monomers (total)                             | 56.50 (3.41) |          |   | -     | - |
|        | monomer anhydro                              | 26.89 (2.99) |          |   | -     | - |
|        | dimers (total)                               | 43.50 (3.41) |          |   | -     | - |
|        | dimers anhydro                               | 12.76 (0.90) |          |   | -     | - |
|        | Glycan strand length<br>(anhydro chain ends) | 33.27 (2.57) |          |   | -     | - |
|        | degree of cross-linkage                      | 21.75 (1.70) |          |   | -     | - |
|        | % peptides in cross-<br>links                | 43.50 (3.41) |          |   | -     | - |

Analysis was performed by high performance liquid chromatography (HPLC) and mass spectrometry.

Numbering and peak identity corresponds to the HPLC peak numbers in Fig. 1.

RT: Retention Time, CPM/Area: Radioisotope counts per minute divided by the peak area.

\* Unidentified peak that does not contain L-Orn.

<sup>‡</sup> Means and standard deviations were calculated from three independent experiments.

Note: Peaks 4 and 10 could not be distinguished from peaks 7 and 11, respectively (by radioisotope trace).
